# Supplementary material
Source: PubMed Central journal article supplement (PMC3151099)
Supplement: supp_M111.227942_jbc.M111.227942-1.pdf [file supp_M111.227942_jbc.M111.227942-1.pdf]

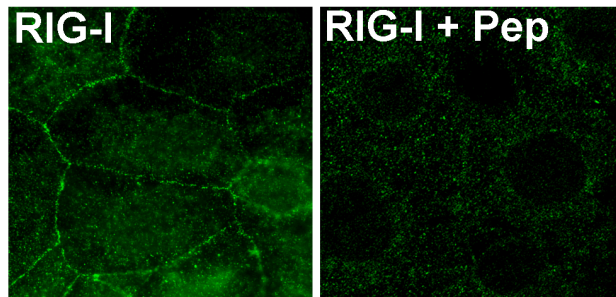

**Supplemental Figure 1:** Immunofluorescence microscopy for RIG-I in HT-29 cells incubated with anti-RIG-I L-15 goat polyclonal antibody in the absence (left) or presence (right) of blocking peptide (1 $\mu$ g/mL). Anti-RIG-I L-15 antibody was incubated with blocking peptide for 1hr at room temperature and then immunofluorescence performed as described in Materials and Methods.
